# Supplementary material for: AI in human rights due diligence reporting monitoring: Evaluating regulatory design for effective compliance
Source: Research Square preprint supplement (doi:10.21203/rs.3.rs-6229640/v1), 2025-06-06
Supplement: Supplementary file 1 [file 781c1b945fff4c9193560960.docx]

# Supplementary Information

# Appendix 1:

**Justification for the Inclusion of Legal Instruments in the Study:**

The study explicitly focuses on nationally implemented regulatory instruments with reporting obligations specifically addressing HRDD. The following selected laws align clearly with these criteria:

California Transparency in Supply Chains Act (2010), UK Modern Slavery Act (2015), Australian Modern Slavery Act (2018), NSW Modern Slavery Act (2018), and Canadian Bill S-211 (2024) were included because they specifically require covered entities to transparently report their efforts to identify, assess, and address risks of modern slavery, forced labour, or child labour within their supply chains. Even though these laws vary in enforcement strength, each establishes a clear statutory transparency mandate regarding business practices related to human rights abuses.

French Corporate Duty of Vigilance Law (2017), German Supply Chain Due Diligence Act (2021), and Norwegian Transparency Act (2021) were included because they explicitly establish a clear, legally mandated requirement for companies to conduct comprehensive human rights and environmental due diligence across their operations and supply chains. They also require covered entities to report publicly on these efforts annually, thus fully aligning with the study’s criteria.

The Swiss Transparency laws (both the Non-Financial Reporting Provisions (2022) and the Ordinance on Due Diligence and Transparency for Conflict Minerals and Child Labour (2021), the Dodd-Frank Act Section 1502, the EU Conflict Minerals Regulation (2017), were included because they impose specific mandatory reporting and due diligence obligations on entities concerning minerals and metals sourcing from conflict-affected and high-risk areas, thereby fulfilling the criteria set for inclusion.

####

####

####

#### Table 6: Detailed Description of the Legal Instruments Analysed in this Paper

| **Law Name** | **Year** | **Personal Scope** | **Material Scope** | **Reporting Duty** | **Publishing Mechanism** | **Enforcement Power** |
| --- | --- | --- | --- | --- | --- | --- |
| California Senate Bill 657- California Transparency in Supply Chains Act (TSCA) | 2010 | Retailers/manufacturers doing business in California with global turnover >$100M | Slavery and human trafficking | Annual disclosure on five specific areas | Company website (homepage link) | Attorney General injunction (no direct fines) |
| Dodd-Frank Act Section 1502 – U.S. Conflict Minerals Rule | 2010 | Covers public companies (issuers) filing reports with the SEC (Security Exchange Commission) under the Securities Exchange Act. using 3TG minerals | Conflict minerals (tin, tantalum, tungsten, gold from DRC-region) or adjoining countries​ | Annual conflict minerals due diligence report (SEC Form SD) describing due diligence | SEC filing system (EDGAR) & company website | SEC enforcement (can include penalties) |
| UK Modern Slavery Act (UK MSA) - Section 54 (Transparency in Supply Chains) | 2015 | Companies with turnover ≥£36M operating in UK | Modern slavery | Annual modern slavery statement approved and signed by the board of directors, covering suggested reported criteria | Company website & voluntary central registry | The regime relies heavily on public and investor scrutiny, even if the Secretary of State may seek a High Court injunction, which has not happened so far |
| EU Regulation 2017/821 EU Conflict Minerals Regulation | 2017 | EU importers of tin, tantalum, tungsten, gold above volume thresholds, regardless of the company size | Conflict minerals from conflict-affected areas | Annual due diligence report describing specific criteria, submitted to their designated Member State authority | Sent to national authority oversight (no EU-wide registry); public disclosure (company website); | Member States’ Competent Authorities(MSCAs), which are responsible for ensuring the effective and uniform; each can decide on fines & penalties |
| Law n° 2017-399 on the Duty of Vigilance | 2017 | Companies ≥5,000 employees in France or ≥10,000 globally (foreign firms in France) | Human rights, fundamental freedoms, health and safety, and environmental risks | Annual vigilance plan describing at least a minimum of criteria | As part of the company’s annual management/sustainability report (website publication, no central registry) | Civil enforcement via courts; court-ordered fines possible (no direct administrative regulator) |
| Australian Modern Slavery Act | 2018 | Entities operating in Australia with revenue ≥AUD 100M | Modern slavery | Annual modern slavery statement describing key mandatory criteria | Central government registry & company website | Currently, there are no fines; The Attorney General’s Department is overseeing the Act. An Australian Anti-Slavery Commissioner was established, but there is no clear oversight authority yet (pending reforms to introduce fines) |
| NSW Modern Slavery Act (amended) | 2018 | NSW government agencies (private sector obligation repealed) | Modern slavery | Annual modern slavery statement and completing a mandatory Annual Reporting Form with mandatory criteria | Public registry managed by NSW Anti-Slavery Commissioner | Administrative oversight by NSW Anti-Slavery Commissioner; no clear fines |
| Germany’s Act on Corporate Due Diligence Obligations in Supply Chains (Lieferkettensorgfaltspflichtengesetz or LkSG) | 2021 | Companies ≥3,000 employees (2023); ≥1,000 employees from 2024, including foreign branches in Germany | Human rights, labour rights, environmental protections | Annual due diligence report covering specific criteria | Company website & filing a questionnaire with Federal Office (BAFA) | Administrative fines ≤€8M or 2% global turnover; possible exclusion from public tenders |
| Norwegian Transparency Act (Åpenhetsloven) | 2021 | Medium/large enterprises in Norway meeting ≥2 criteria (revenue ≥NOK70M, balance sheet ≥NOK35M, ≥50 employees) | Human rights & decent working conditions | Annual human rights due diligence report covering specific criteria & duty to respond to information requests | Company website publication (no central registry) | Norwegian Consumer Authority; administrative fines for non-compliance |
| Swiss Code of Obligations(Conflict Minerals & Child Labour Ordinance) | 2021 | Entities domiciled in Switzerland meeting ≥2 criteria (balance sheet ≥CHF 20M, revenue ≥CHF 40M, ≥250 employees) or any company with confirmed child labour in its supply chain. | Conflict minerals (3TG) & child labour | Annual due diligence report describing key criteria | Company website; no central registry | No administrative oversight; fines ≤CHF100,000 (intentional breach), CHF50,000 (negligence) imposed on the responsible individuals within the companies, not the legal entities themselves |
| Swiss Code of Obligations (Non-Financial Reporting Provisions) | 2022 | Large Swiss public-interest entities (≥500 employees & CHF20M turnover or CHF40M assets) | Environmental, Social, and Governance (ESG) topics | Annual non-financial report describing key criteria | Company website; no central registry | Primarily, shareholder oversight; fines ≤CHF100,000 (intentional breach), CHF50,000 (negligence) imposed on the responsible individuals within the companies, not the legal entities themselves |
| Canadian Bill S-211 – Fighting Against Forced Labour and Child Labour in Supply Chains Act (2023) | 2023 | Publicly traded or entities in Canada meeting ≥2 criteria: assets ≥C$20M, revenue ≥C$40M, ≥250 employees; government institutions | Forced labour & child labour in supply chains | Annual forced/child labour report covering key criteria | Central government registry & company website | Administrative oversight by Public Safety and enforcement; fines ≤C$250,000; personal liability for directors/officers |

**Justification for Exclusion of Legal Instruments in the Study:**

Certain legal instruments have been excluded from this study as they do not fully align with its focus, either due to the absence of explicit human rights reporting requirements or because they are still awaiting national implementation. While these frameworks do not currently meet the study’s criteria for national-level transparency mandates, their future enforcement or evolution may allow for their inclusion. For instance, the Netherlands Child Labour Due Diligence Act (2019), though passed, is awaiting replacement to align with broader EU regulations. Similarly, the EU Corporate Sustainability Reporting Directive (CSRD, 2022) and the EU Corporate Sustainability Due Diligence Directive (CSDDD, 2024), are awaiting updates based on the February 2025 Omnibus Proposal by the European Commission [(1)](https://www.zotero.org/google-docs/?sPvqUt). Additionally, laws primarily enforcing import bans on forced labour, such as Canada’s Customs Tariff (2020), the United States’ Tariff Act of 1930 and Uyghur Forced Labor Prevention Act (2021), as well as the European Union’s Forced Labour Regulation (2024), restrict the sale of goods made with forced labour but do not impose corporate reporting obligations. These exclusions ensure that the study maintains a consistent focus on legally binding, national-level HRRD reporting mandates.

# Appendix 2:

This appendix builds on the analysis provided in Sections 4.1 - 4.3, offering a more detailed breakdown of key data collection, analysis and utilisation challenges faced when evaluating entity human rights disclosures. It expands on the recommendations as well as AI implications.

### Data Collection Challenges, Legal Design Recommendations, and AI Implications

**DCC.1:**Many criteria used to determine the personal scope, such as turnover or employee numbers, are subject to annual fluctuations. Consequently, the number of entities impacted by these laws can vary. As shown in Section 4.1.1, only some of the legislations have a public estimate of the annual number of entities expected to report, and still, these figures are not absolute. This uncertainty is often due to the need for a dedicated government body to provide a comprehensive annual list of the companies affected by these laws. What is more, these legislations are constantly being reviewed and changed, and every change in the personal scope of the legislation directly impacts the amount of data that needs to be analysed.

**Legal Design Recommendation:**

Each government should establish a centralised, publicly accessible list of all entities subject to the laws, updated annually. This list would simplify monitoring and data collection efforts.

**AI Implication:**

A structured entity list allows for more reliable entity resolution in AI systems, ensuring reports can be accurately matched to entities across jurisdictions and over time. This means that each year, there is a clear understanding of what data needs to be analysed. It also supports automated data pipelines that crawl or scrape reports directly from identified entities.

**DCC.2:**Not having a clear guide on where reports should be published hinders data collection, making it more time-consuming and likely resulting in incomplete datasets. Also, despite reports being available on websites, without an annual list of entities subject to the law, it is challenging to determine which websites to visit for report retrieval, leading to gaps in the data collected and, therefore to missing or incomplete data. For instance, despite the UK MSA being passed in 2015, the UK Government only established a centralised registry for modern slavery reports in 2021. Prior to this, for more than four years, the BHRRC managed the Modern Slavery Registry [(2)](https://www.zotero.org/google-docs/?732NNh), which gathered 16,000 reports published in response to UK MSA and Californian TSCA from 2015-2020, although acknowledging the potential for these collections to be incomplete. As of early 2025, the data gathered exclusively from the registries operated by the UK, Australian, and Canadian governments, along with historical statements collected on the BHRRC Registry before establishing the UK registry, totals over 90,000 statements.
Moreover, storing the reports only in links on companies’ websites can result in considerable data loss. For example, the data from this registry was used in developing Project AIMS, where the team encountered significant difficulties accessing the reports directly from companies’ websites, losing approximately 30% of the reports [(3)](https://www.zotero.org/google-docs/?I4RPno).

**Legal Design Recommendation:**

Every jurisdiction should maintain a centralised, monitored registry, overseen by the relevant authority, requiring entities to submit reports directly. This registry should:

- Allow effortless downloading and/or application programming interface (API) access for efficient data management.
- Accept voluntary submissions from non-mandated entities to enhance the diversity of available reports.
- Complement (not replace) the requirement for companies to host reports on their websites.

**AI Implication:**

Centralized registries with API access enable direct data feeds into analysis systems, allowing real-time ingestion and analysis using automated crawlers and AI pipelines. This reduces manual collection effort and improves data completeness.

**DCC.3:**Reports are published in inconsistent formats, with no uniform machine-readable standard, making data extraction difficult. Inconsistent and unreliable metadata further complicate comparative and longitudinal analyses.

Even with centralised government registries, not all submissions are mandatory, leading to similar issues with relying on website-based report retrieval. Additionally, while most legislations do not mention the format required for the reports, those collected in these registries and on websites are predominantly in PDFs, creating challenges for data extraction and wrangling to clean and structure it. This challenge is highlighted in Section 2.3.5. and extensively analysed in Project AIMS’s documentation [(3)](https://www.zotero.org/google-docs/?fajMUo).

An example of good practice can be found in NSW MSA, where there is an Annual Reporting Template used to assist public entities with building their annual reports and to directly share structured data with the NSW ASC [(4)](https://www.zotero.org/google-docs/?JopBDn). This illustrates how good design can ensure a structured dataset format, with all the data being centrally collected and easily accessible.

**Legal Design Recommendation:**

Mandate that reports be published in a standardised, machine-readable format. All reports should include essential metadata such as:

- Reporting period
- Timestamp
- Company headquarters address and other relevant identifiers.
  This ensures better data integration and comparability across jurisdictions.

**AI Implication:**

Standard reporting formats enable automated parsing and data structuring, reducing pre-processing time for AI tools. AI pipelines can more reliably extract key sections for analysis, and metadata tags can directly feed into supervised AI models that classify and score reports.

**DCC.4:**The increasing volume of reports makes comprehensive examination challenging, with only a small sample analysed each year.

**Legal Design Recommendation:**

To ensure uniform scrutiny across all reports, authorities should integrate AI-powered tools to assist with data analysis. AI can:

- Rapidly process large volumes of reports.
- Identify long-term trends and patterns that may be missed in manual reviews.

This approach enhances the depth, speed, and consistency of report analysis, enabling more informed decision-making.

**AI Implication:**

AI-powered text mining, topic modelling, anomaly detection, and sentiment analysis can scale analysis to cover all reports, not just samples. This enables predictive risk modelling and trend identification over time. Combining unsupervised discovery with supervised compliance checks allows for both exploratory insights and structured evaluations.

### Data Analysis Challenges, Legal Design Recommendations, and AI Implications

**DAC.1:**The literature review shows that transparency legislation alone is assessed to have not led to concrete business action. However, monitoring due diligence compliance often requires going beyond entity reports. In some jurisdictions, civil society or regulators actively review company actions, while in others, monitoring frameworks remain less clear. Effective analysis may, therefore, require a hybrid approach — analysing report content but also cross-verifying actions and external data sources to evaluate whether companies genuinely implemented due diligence processes. This ensures that transparency is paired with actionable measures for human rights protection and entity accountability [(5)](https://www.zotero.org/google-docs/?Wxf8at). Although mandatory HRDD is still relatively new and empirical evidence of its effectiveness is limited, this approach aligns with international best practices and expert recommendations.

**Legal Design Recommendation:**

Legal instruments should mandate comprehensive HRDD in addition to reporting obligations. The laws should also require entities to link to third-party audits, supplier feedback, and grievance mechanisms in their reports.

**AI Implication:**

The type of AI-assisted analysis possible depends heavily on the clarity and structure of each law’s reporting requirements. Under general disclosure laws, analysis tends to be exploratory, focusing on information chosen by companies rather than dictated by law. In contrast, prescribed disclosure laws allow for structured, targeted analysis, as they set clear expectations for the content and format of reports.
Under general disclosure laws, exploratory analysis using unsupervised learning (e.g., topic modelling, clustering) helps detect patterns across diverse and inconsistent reports. Under prescribed disclosure laws, structured reports enable supervised learning to assess compliance with specific criteria. Assessing due diligence laws requires mixed-method approaches, combining text analysis of reports, external data verification (NGO reports, lawsuits, supplier data), and hybrid AI (combining supervised classification with unsupervised risk discovery). While more complex, the latter approach allows AI systems to evaluate both the content and substance of claims made in the report. To support this, entities can integrate extra materials in their reports, which will enable external evidence to augment AI models’ analysis, improving risk detection and compliance confidence.

**DAC. 2:**

The diversity of sectors leads to variations in the types of risks they encounter and the corresponding reporting requirements needed to address those risks effectively.

**Legal Design Recommendation:**

To enhance transparency and accountability, it is recommended that sector-specific reporting guidance be developed in conjunction with existing general reporting obligations. This means that each sector should have tailored guidelines that take into account its unique characteristics, operational challenges, and the specific risks it faces. By doing so, entities can ensure they meet their reporting duties while providing relevant information that reflects their sector's realities.

**AI Implication:**

The creation of sector-specific reporting guidelines opens the door for the development of AI models customised for particular industries. These specialised AI tools will be better equipped to identify and assess risks that are unique to each sector.

**DAC. 3:**

The absence of agreed-upon reporting and compliance standards leads to non-uniform and non-standardized reporting, complicating objective evaluation, comparative analysis, and longitudinal tracking**.** For data analysis, a narrow material scope means that the focus is more defined and specific. Analysts can concentrate on a limited set of criteria, making it easier to standardise the analysis. This specificity might allow for more straightforward comparisons and benchmarking across different entities or jurisdictions. However, it may limit the breadth of understanding of how companies tackle this issue as part of broader human rights or environmental issues. With a broader material scope, data analysis becomes more complex and challenging, and analysts must handle various data types and sources. In this scenario, the criteria for analysis tend to be less standardised, leading to potential variations in interpretation and assessment and difficulties in benchmarking and comparing companies. While this complexity can provide a more holistic view of a company's impact on human rights and the environment, it requires more sophisticated analytical tools and methodologies. It also calls for vast cross-disciplinary expertise in analysis.

Moreover, misalignment between legal instruments imposes extra compliance burdens on entities operating across jurisdictions while complicating cross-border comparative analysis. Harmonised standards would:

- Facilitate the development of consistent analytical methodologies.
- Enable effective use of advanced techniques like AI.
- Support cross-legal comparison and long-term trend analysis.
- Reduce disputes over evaluation criteria and enhance transparency around entity accountability and human rights performance.
- Reduce duplicative reporting for multinational companies.
- Enhance international cooperation and information sharing, supporting more effective redress and entity accountability [(6)](https://www.zotero.org/google-docs/?fWiHiM).

**Legal Design Recommendation:**

Legislation should mandate clear, standardised disclosure requirements and agreed-upon compliance criteria to ensure uniform, comparable, and reliable reporting across entities and jurisdictions [(7)](https://www.zotero.org/google-docs/?l0J15W). This can include, for instance, a minimum human rights baseline that all laws must cover (e.g. forced labour, child labour, freedom of association. International efforts should also aim to synchronise reporting criteria across jurisdictions.

**AI Implication:**

Standardised reports allow for rule-based analysis and supervised AI to classify and score compliance consistently across reports. Standardisation with well-defined material scope, narrow or broad, enables AI models to work with clearer labels and more predictable patterns. Harmonised global standards would enable cross-border AI models, reducing the need for jurisdiction-specific models. This supports the development of large multilingual compliance datasets for training more effective AI systems.

**DAC. 4:**

Diverse methodologies and metrics used in different studies hinder the development of unified compliance assessment tools.

**Legal Design Recommendation:**

A consensus among stakeholders—including governments, civil society, academia, and business—is needed to define adequate reporting and compliance standards, as well as consistent analytical approaches for evaluating compliance. This shared understanding will enable analysts to develop unified AI models and other advanced analytical tools capable of integrating multiple data sets without risking inconsistencies.

**AI Implication:**

Unified standards allow for the development of harmonised AI models, which can be applied across jurisdictions and industries, enhancing comparability and longitudinal tracking.

### Data Utilization Challenge, Legal Design Recommendation, and AI Implication

**DUC.1:**Lack of clear enforcement leads to superficial reports with insufficient detail, as entities face no real repercussions for non-reporting or incomplete reporting. With minimal enforcement regimes and civil (private) enforcement, entities prioritise disclosing data that enhances their public image, often at the expense of full legal compliance, by focusing on areas valued by external stakeholders such as consumers, investors, and civil society.

**Legal Design Recommendation:**

Shift from minimal enforcement to consistent and stringent oversight by regulatory authorities. This should include:

- Clear sanctions for non-reporting, incomplete reporting, or false information.
- Empowering oversight bodies to impose significant penalties to incentivise compliance [(7)](https://www.zotero.org/google-docs/?FwB1UL).

**AI Implication:**

Stronger enforcement creates a structured dataset where non-compliance signals (e.g., missing sections, vague responses) can be flagged using supervised learning models trained on historical enforcement data. AI can help quantify report quality and completeness.

**DUC.2:**In the absence of a clearly defined responsible party to scrutinise the reports published by entities, monitoring is left in the hands of a variety of stakeholders, leading to fragmented analysis frameworks and strategies and difficulties in comparing results. Over-reliance on market forces and voluntary oversight mechanisms leaves stakeholders without the formal tools to verify and enforce compliance [(7)](https://www.zotero.org/google-docs/?broken=H1DI34). When repercussions for non-compliance are legislated, regulatory authorities are expected to rigorously review each company report and utilise the data for compliance monitoring to ensure adherence to legal standards. Given the penalties for non-compliance or misinformation, authorities must be well-versed in identifying critical information within reports and centralising it for efficient oversight.

**Legal Design Recommendation:**

Establish a dedicated regulatory authority responsible for:

- Annual review of all entities’ reports, with clear authority to enforce compliance.
- Operate with a clear governance framework that separates advisory and regulatory roles.
- Be adequately funded, staffed and trained [(8)](https://www.zotero.org/google-docs/?jkpYqW). Staff should have interdisciplinary experts combining regulatory, human rights, environmental, and AI/data science expertise.
- Maintaining a centralised public database of reports, ensuring transparency and enabling external scrutiny.
- Maintaining the official platform that presents the AI-assisted annual analysis of all results, made accessible for all stakeholders.
- Creating a clear channel for external consultation and engagement from civil society, academics, and other stakeholders.

**AI Implication:**

A centralised platform maintained by a well-funded and staffed regulatory authority enables continuous AI-based monitoring, allowing for trend analysis, risk profiling, and anomaly detection across years and sectors. Combining structured metadata with full-text analysis allows for both quantitative scoring and qualitative content analysis to assess compliance and quality.

**DUC.3:**Annual manual assessment of all reports exceeds available resources and capacity, undermining consistent oversight and analysis.

**Legal Design Recommendation:**

The oversight authority should conduct continuous monitoring using AI to track year-over-year patterns in reports and detect emerging themes. This entity should leverage AI-powered tools to support large-scale, efficient analysis and trend detection, reducing reliance on purely manual assessments.

**AI Implication:**

AI tools can triage reports for human review, flagging high-risk cases for deeper analysis. Predictive models can anticipate future compliance risks based on patterns detected across multiple reporting cycles, helping regulators focus limited resources more efficiently.

# References

[1.](https://www.zotero.org/google-docs/?iiKRL0) European Commission. Corporate sustainability reporting - European Commission [Internet]. [cited 2025 Mar 14]. Available from: https://finance.ec.europa.eu/capital-markets-union-and-financial-markets/company-reporting-and-auditing/company-reporting/corporate-sustainability-reporting_en

[2.](https://www.zotero.org/google-docs/?iiKRL0) Business & Human Rights Resource Centre [Internet]. [cited 2025 Mar 13]. Modern Slavery Statements. Available from: https://www.business-humanrights.org/en/from-us/modern-slavery-statements/

[3.](https://www.zotero.org/google-docs/?iiKRL0) Weinberg N, Bora AE, Sassetti F, Bryant K, Rootalu E. AI against Modern Slavery: Digital Insights into Modern Slavery Reporting - Challenges and Opportunities. Available from: https://ceur-ws.org/Vol-2884/paper_110.pdf

[4.](https://www.zotero.org/google-docs/?iiKRL0) Office of the Anti-slavery Commissioner. Guidance on Reasonable Steps. 2023; Available from: https://dcj.nsw.gov.au/documents/legal-and-justice/anti-slavery-commissioner/due-diligence-and-reporting/guidance-on-reasonable-steps.pdf

[5.](https://www.zotero.org/google-docs/?iiKRL0) Human Rights Law Centre [Internet]. 2022 [cited 2025 Mar 13]. Broken Promises: Two years of corporate reporting under Australia’s Modern Slavery Act. Available from: https://www.hrlc.org.au/reports-news-commentary/broken-promises

[6.](https://www.zotero.org/google-docs/?iiKRL0) Gustafsson MT, Schilling-Vacaflor A, Lenschow A (2023) The politics of supply chain regulations: Towards foreign corporate accountability in the area of human rights and the environment? Regulation & Governance [Internet]. [cited 2023 Oct 8];n/a(n/a). Available from: https://onlinelibrary.wiley.com/doi/abs/10.1111/rego.12526

[7.](https://www.zotero.org/google-docs/?iiKRL0) Nolan J, Bott G (2018) Global supply chains and human rights: spotlight on forced labour and modern slavery practices. Aust J Hum Rights 24(1):44–69.

[8.](https://www.zotero.org/google-docs/?iiKRL0) Hoex L, Sépulchre J-S, Marianne M (2023) The EU Conflict Minerals Regulation: High Stakes, Disappointing Results. Available from: https://ipisresearch.be//wp-content/uploads/2023/10/20231019_IPIS-The-EU-conflict-minerals-regulation_High-stakes-disappointing-results.pdf
